# Supplementary material for: Clinical Efficacy and Safety of Anti-vascular Biosimilars Compared to Reference Anti-vascular for neovascular age-related macular degeneration: A Systematic Review, Meta-Analysis and Meta-regression.
Source: Research Square preprint supplement (doi:10.21203/rs.3.rs-7909324/v1), 2025-12-03
Supplement: Supplementary file 1 [file 9b1da5cc05bd50c55e3e7141.docx]

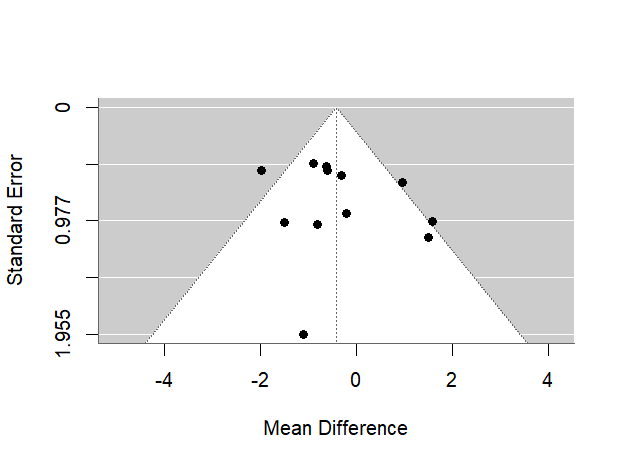


**Figure 1:** Funnel plot assessing potential publication bias in the BCVA outcomes for anti-VEGF biosimilars compared to their reference in the first 12 weeks.


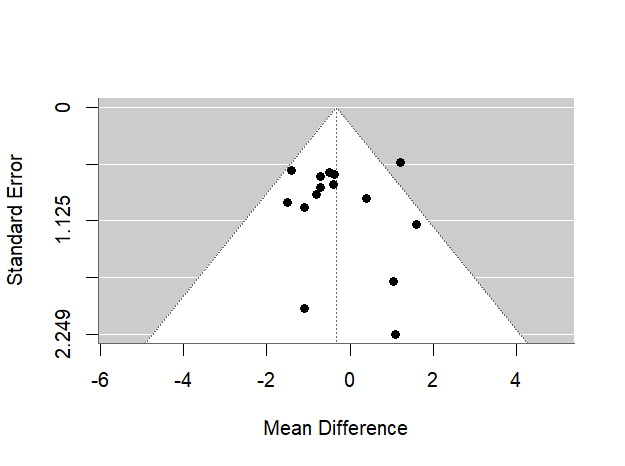


**Figur 2:** Funnel plot assessing potential publication bias in the BCVA outcomes for anti-VEGF biosimilars compared to their reference.


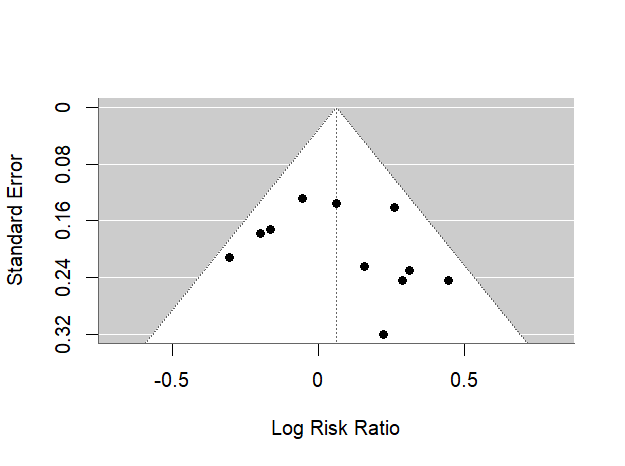


**Figure 3:** Funnel plot assessing potential publication bias in the responders’ rate for anti-VEGF biosimilars compared to their reference.


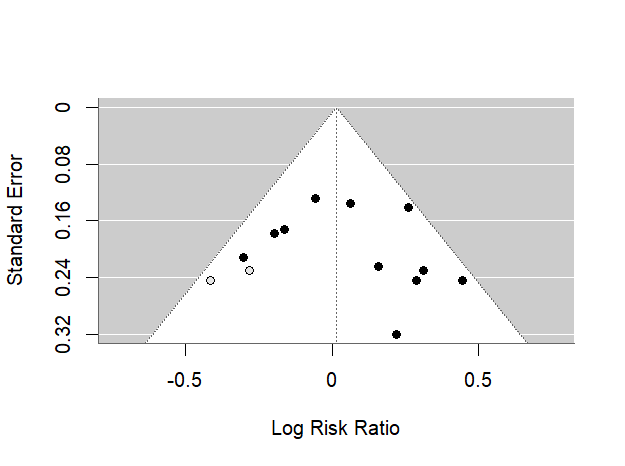


**Figure 4:** Adjusted funnel plot following the Trim and Fill imputation method for publication bias in the responders’ rate for anti-VEGF biosimilars compared to their reference.


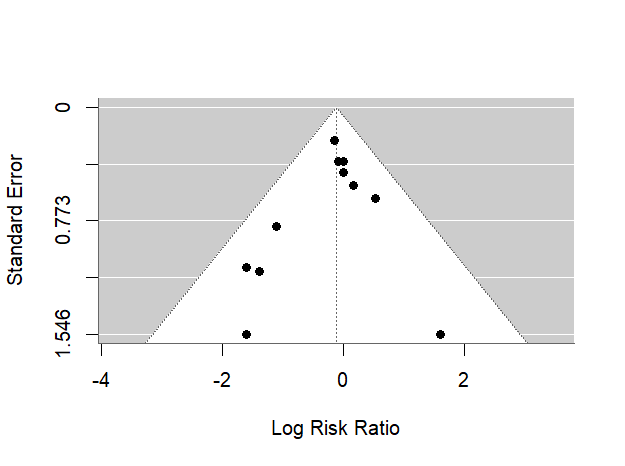


**Figure 5:** Funnel plot assessing potential publication bias in the incidence of Treatment-Emergent ADAs for anti-VEGF biosimilars compared to their reference.


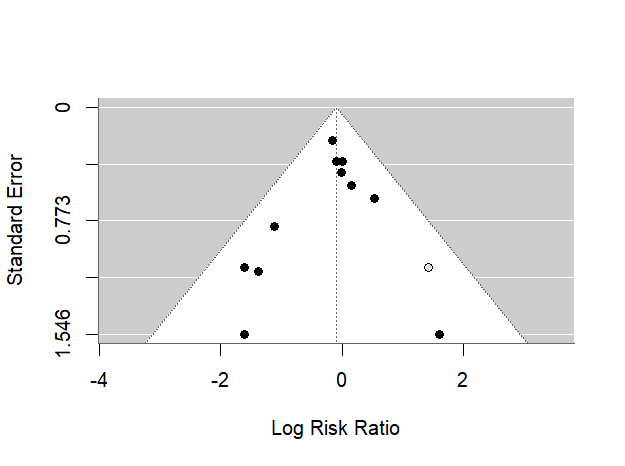


**Figure 6:** Adjusted funnel plot following the Trim and Fill imputation method for publication bias in the incidence of Treatment-Emergent ADAs for anti-VEGF biosimilars compared to their reference.
